# Supplementary material
Source: Springer Nature journal article supplement (https://www.springermedizin.de/resource/supplementary/12905_2013_399_MOESM1_ESM.pdf/9518680)

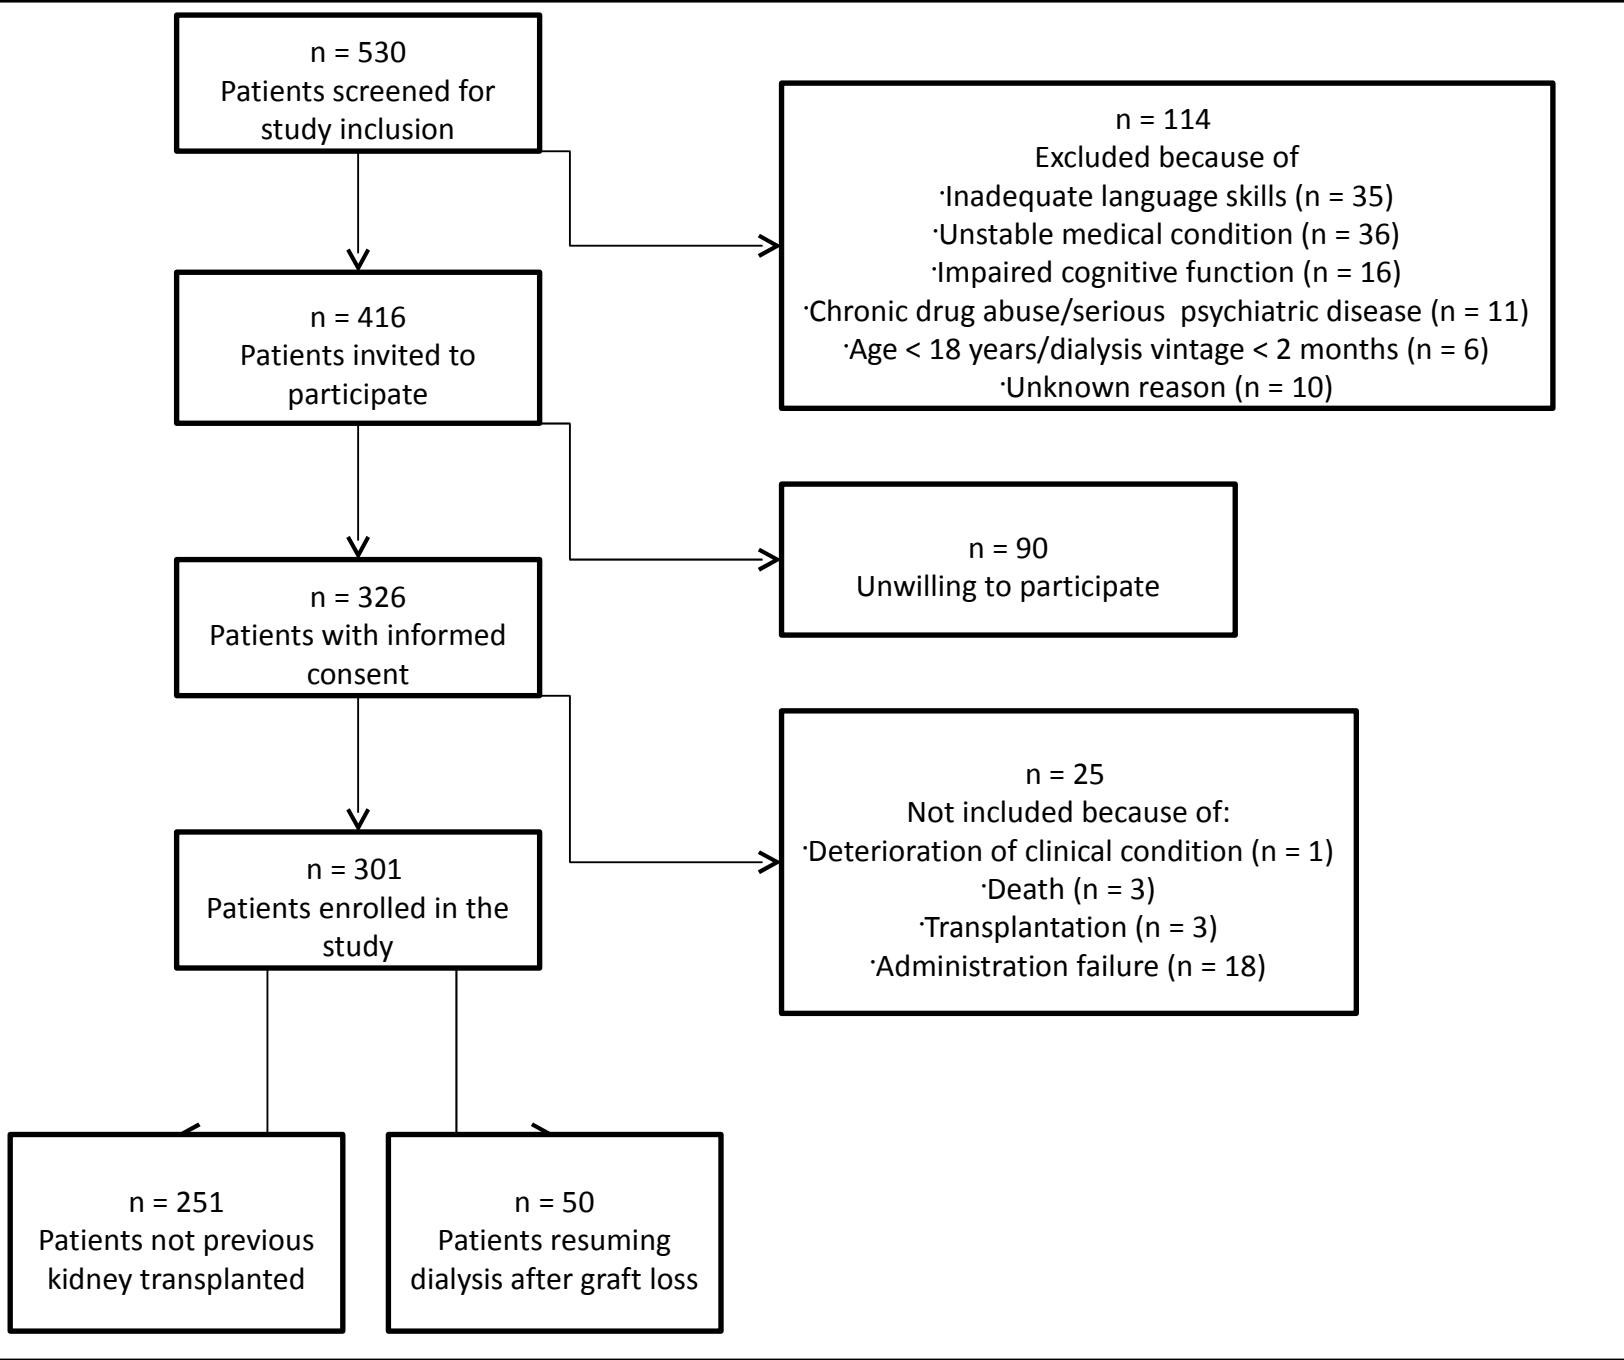

Supplement: MOESM1 [file 9518680]
